# Supplementary material
Source: PubMed Central journal article supplement (PMC3567741)
Supplement: 3c90f95527fc27f145b819736fb8f063_genetics.112.145979-1.pdf [file 3c90f95527fc27f145b819736fb8f063_genetics.112.145979-1.pdf]

|                          | MSH4     | MSH5      | MLH1      | MLH3      | ZIP1      | ZIP2     | ZIP3      | ZIP4      | MER3      |
|--------------------------|----------|-----------|-----------|-----------|-----------|----------|-----------|-----------|-----------|
| <i>V polysporus</i>      | 10       | 15        | 16        | 10        | 33        | 30       | 1         | 13        | 15        |
| <i>L kluyveri</i>        | 24       | 35        | 30        | 22        | 53        |          | 20        | 23        | 25        |
| <i>L thermotolerans</i>  |          |           | 24        | 5         |           |          |           |           |           |
| <i>L waltii</i>          |          |           | 19        | 48        | 45        |          |           |           | 5         |
| <i>K lactis</i>          | 13       | 20        | 26        | 12        | 45        | 8        | 8         | 45        | 19        |
| <i>E gossypii</i>        |          |           | 4         | 6         | 9         |          |           |           |           |
| <b><i>C glabrata</i></b> | <b>2</b> | <b>14</b> | <b>38</b> | <b>21</b> | <b>32</b> | <b>3</b> | <b>17</b> | <b>30</b> | <b>10</b> |
| <i>N castellii</i>       | 31       | 21        | 34        | 14        | 63        | 18       | 49        | 30        | 9         |
| <i>S bayanus</i>         | 24       | 30        | 23        | 46        | 43        | 38       | 18        | 51        | 32        |
| <i>S mikatae</i>         | 15       | 46        | 26        | 38        | 44        | 47       | 5         | 39        | 34        |
| <i>S paradoxus</i>       | 15       | 49        | 17        | 23        | 56        | 32       | 16        | 24        | 26        |
| <i>S cerevisiae</i>      | 23       | 37        | 39        | 30        | 61        | 56       | 18        | 29        | 30        |
| <i>C tropicalis</i>      | 7        | 12        | 9         | 2         |           |          | 5         | 9         | 5         |
| <i>C albicans</i>        | 7        | 12        | 54        | 1         |           |          | 4         | 19        | 4         |
| <i>C dubliniensis</i>    | 8        | 12        | 43        | 2         |           |          |           | 22        | 7         |
| <i>C lusitaniae</i>      |          |           | 29        |           |           |          |           |           |           |
| <i>C guilliermondii</i>  |          |           | 10        | 15        |           |          |           |           |           |
| <i>D hansenii</i>        |          |           | 18        | 22        |           |          |           |           | 21        |

**Figure S1** Several crossover proteins show low CAI ranks in *Candida glabrata*. We corrected for the genome-wide distribution of CAI in each species by reporting each gene's rank, shown here as percentile rank. In these data, *C. glabrata* has very low codon bias for *MSH4*, *MSH5*, *ZIP1*, *ZIP3*, and *MER3*, but bias at *MLH1*, *MLH3*, and *ZIP4* are not as extreme.

**Figure S2**

**Available for download as a PDF file at <http://www.genetics.org/lookup/suppl/doi:10.1534/genetics.112.145979/-/DC1>.**

This pairwise matrix shows empirical P-values for the set of 129 meiosis proteins in yeasts. Each value corresponds to the P-value for the column protein within all values of the row protein. Hence, values above and below the diagonal are similar but can differ. Empirical P-values in the main manuscript are the mean of these two values. There are a number of clusters of elevated ERC within this large set of proteins.

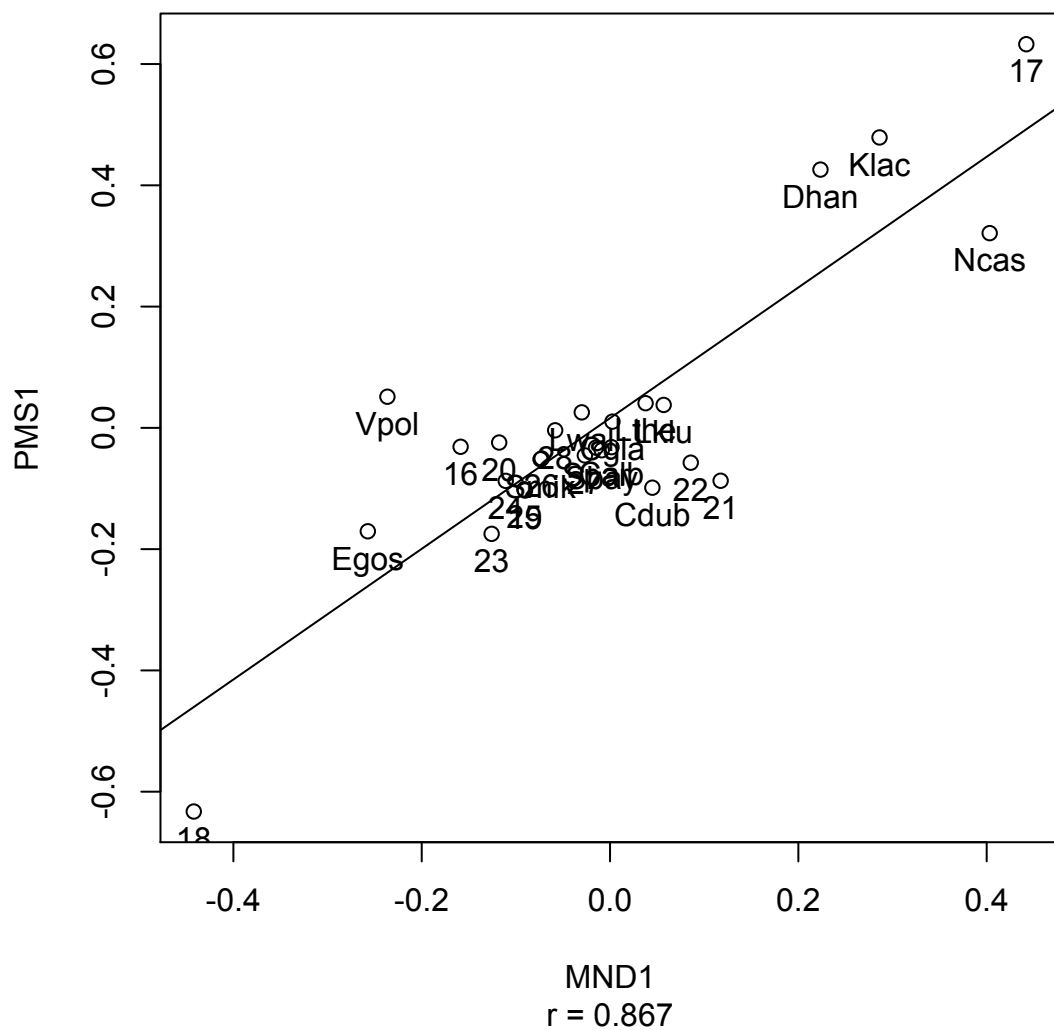

**Figure S3** The relative rates of the Mnd1 and Pms1 proteins correlate very well in yeasts ( $r = 0.867$ ), and their relationship involves several branches from the phylogenetic tree. Three species (*N. castelii*, *K. lactis*, and *D. hansenii*) and one internal branch had particularly rapid rates of evolution for these two DNA repair proteins.

**Figure S4**

**Available for download as a PDF file at <http://www.genetics.org/lookup/suppl/doi:10.1534/genetics.112.145979/-/DC1>.**

This pairwise matrix shows empirical P-values for a set of 91 mammalian meiotic proteins. Each value corresponds to the P-value for the column protein within all values of the row protein. Hence, values above and below the diagonal are similar but can differ. Empirical P-values in the main manuscript are the mean of these two values. There are a number of notable clusters of high ERC in this matrix. In particular there were two clusters involving piRNA production and metabolism (see main text).

**Table S1 Species-specific patterns of meiotic gene loss**

|                                | missing<br>Meiotic<br>genes<br>(of 128) | proportion<br>missing: Meiosis | proportion<br>missing:<br>Genome | missing<br>proportion<br>ratio: Meiosis<br>to Genome | meiosis-<br>specific<br>expression: P-<br>value |
|--------------------------------|-----------------------------------------|--------------------------------|----------------------------------|------------------------------------------------------|-------------------------------------------------|
| <i>V polysporus</i>            | 1                                       | 0.008                          | 0.124                            | 0.063                                                | 0.43239                                         |
| <i>L kluyveri</i>              | 5                                       | 0.039                          | 0.174                            | 0.225                                                | 0.90304                                         |
| <i>L thermotolerans</i>        | 15                                      | 0.117                          | 0.194                            | 0.606                                                | 0.00895                                         |
| <i>L waltii</i>                | 17                                      | 0.133                          | 0.176                            | 0.754                                                | 0.12492                                         |
| <i>K lactis</i>                | 1                                       | 0.008                          | 0.105                            | 0.074                                                | 0.88704                                         |
| <i>E gossypii</i>              | 8                                       | 0.063                          | 0.147                            | 0.424                                                | 0.00884                                         |
| <i>C glabrata</i>              | 1                                       | 0.008                          | 0.155                            | 0.050                                                | 0.43496                                         |
| <i>N castellii</i>             | 8                                       | 0.063                          | 0.222                            | 0.282                                                | 0.25790                                         |
| <i>S bayanus</i>               | 1                                       | 0.008                          | 0.062                            | 0.126                                                | 0.63988                                         |
| <i>S mikitae</i>               | 3                                       | 0.023                          | 0.088                            | 0.266                                                | 0.86970                                         |
| <i>S paradoxus</i>             | 1                                       | 0.008                          | 0.046                            | 0.168                                                | 0.53128                                         |
| <i>S cerevisiae</i>            | 0                                       | 0.000                          | 0.000                            | NA                                                   | NA                                              |
| <b><i>C tropicalis</i></b>     | <b>31</b>                               | <b>0.242</b>                   | <b>0.220</b>                     | <b>1.102</b>                                         | <b>0.15643</b>                                  |
| <b><i>C albicans</i></b>       | <b>24</b>                               | <b>0.188</b>                   | <b>0.178</b>                     | <b>1.052</b>                                         | <b>0.29070</b>                                  |
| <b><i>C dubliniensis</i></b>   | <b>27</b>                               | <b>0.211</b>                   | <b>0.214</b>                     | <b>0.987</b>                                         | <b>0.01059</b>                                  |
| <b><i>C lusitanae</i></b>      | <b>45</b>                               | <b>0.352</b>                   | <b>0.270</b>                     | <b>1.302</b>                                         | <b>0.00001</b>                                  |
| <b><i>C guilliermondii</i></b> | <b>44</b>                               | <b>0.344</b>                   | <b>0.280</b>                     | <b>1.230</b>                                         | <b>0.00001</b>                                  |
| <b><i>D hansenii</i></b>       | <b>26</b>                               | <b>0.203</b>                   | <b>0.162</b>                     | <b>1.251</b>                                         | <b>0.03978</b>                                  |
