# Supplementary material
Source: PubMed Central journal article supplement (PMC3567741)
Supplement: 8fe61dd850fec28600672da19b86da62_genetics.112.145979-3.pdf [file 8fe61dd850fec28600672da19b86da62_genetics.112.145979-3.pdf]

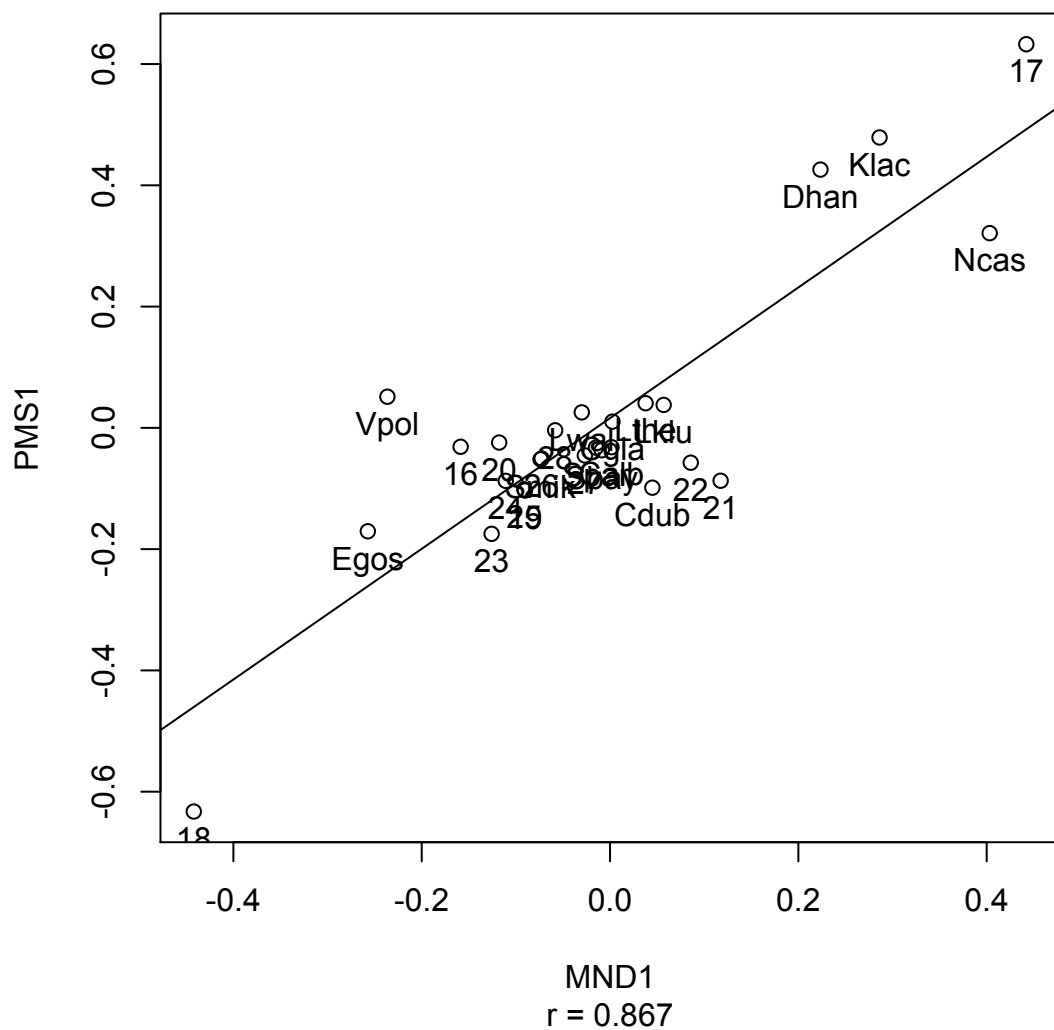

**Figure S3** The relative rates of the Mnd1 and Pms1 proteins correlate very well in yeasts ( $r = 0.867$ ), and their relationship involves several branches from the phylogenetic tree. Three species (*N. castelii*, *K. lactis*, and *D. hansenii*) and one internal branch had particularly rapid rates of evolution for these two DNA repair proteins.
