# Supplementary material
Source: PubMed Central journal article supplement (PMC3567741)
Supplement: cb4a3c3ec6a92a620e945053e5e74055_genetics.112.145979-5.pdf [file cb4a3c3ec6a92a620e945053e5e74055_genetics.112.145979-5.pdf]

**Table S1 Species-specific patterns of meiotic gene loss**

|                                | missing<br>Meiotic<br>genes<br>(of 128) | proportion<br>missing: Meiosis | proportion<br>missing:<br>Genome | missing<br>proportion<br>ratio: Meiosis<br>to Genome | meiosis-<br>specific<br>expression: P-<br>value |
|--------------------------------|-----------------------------------------|--------------------------------|----------------------------------|------------------------------------------------------|-------------------------------------------------|
| <i>V polysporus</i>            | 1                                       | 0.008                          | 0.124                            | 0.063                                                | 0.43239                                         |
| <i>L kluyveri</i>              | 5                                       | 0.039                          | 0.174                            | 0.225                                                | 0.90304                                         |
| <i>L thermotolerans</i>        | 15                                      | 0.117                          | 0.194                            | 0.606                                                | 0.00895                                         |
| <i>L waltii</i>                | 17                                      | 0.133                          | 0.176                            | 0.754                                                | 0.12492                                         |
| <i>K lactis</i>                | 1                                       | 0.008                          | 0.105                            | 0.074                                                | 0.88704                                         |
| <i>E gossypii</i>              | 8                                       | 0.063                          | 0.147                            | 0.424                                                | 0.00884                                         |
| <i>C glabrata</i>              | 1                                       | 0.008                          | 0.155                            | 0.050                                                | 0.43496                                         |
| <i>N castellii</i>             | 8                                       | 0.063                          | 0.222                            | 0.282                                                | 0.25790                                         |
| <i>S bayanus</i>               | 1                                       | 0.008                          | 0.062                            | 0.126                                                | 0.63988                                         |
| <i>S mikitae</i>               | 3                                       | 0.023                          | 0.088                            | 0.266                                                | 0.86970                                         |
| <i>S paradoxus</i>             | 1                                       | 0.008                          | 0.046                            | 0.168                                                | 0.53128                                         |
| <i>S cerevisiae</i>            | 0                                       | 0.000                          | 0.000                            | NA                                                   | NA                                              |
| <b><i>C tropicalis</i></b>     | <b>31</b>                               | <b>0.242</b>                   | <b>0.220</b>                     | <b>1.102</b>                                         | <b>0.15643</b>                                  |
| <b><i>C albicans</i></b>       | <b>24</b>                               | <b>0.188</b>                   | <b>0.178</b>                     | <b>1.052</b>                                         | <b>0.29070</b>                                  |
| <b><i>C dubliniensis</i></b>   | <b>27</b>                               | <b>0.211</b>                   | <b>0.214</b>                     | <b>0.987</b>                                         | <b>0.01059</b>                                  |
| <b><i>C lusitanae</i></b>      | <b>45</b>                               | <b>0.352</b>                   | <b>0.270</b>                     | <b>1.302</b>                                         | <b>0.00001</b>                                  |
| <b><i>C guilliermondii</i></b> | <b>44</b>                               | <b>0.344</b>                   | <b>0.280</b>                     | <b>1.230</b>                                         | <b>0.00001</b>                                  |
| <b><i>D hansenii</i></b>       | <b>26</b>                               | <b>0.203</b>                   | <b>0.162</b>                     | <b>1.251</b>                                         | <b>0.03978</b>                                  |
