# Supplementary material
Source: PubMed Central journal article supplement (PMC3567741)
Supplement: fd7d9f515075dcb50bbe276836d4a2bb_genetics.112.145979-6.pdf [file fd7d9f515075dcb50bbe276836d4a2bb_genetics.112.145979-6.pdf]

|                          | MSH4     | MSH5      | MLH1      | MLH3      | ZIP1      | ZIP2     | ZIP3      | ZIP4      | MER3      |
|--------------------------|----------|-----------|-----------|-----------|-----------|----------|-----------|-----------|-----------|
| <i>V polysporus</i>      | 10       | 15        | 16        | 10        | 33        | 30       | 1         | 13        | 15        |
| <i>L kluyveri</i>        | 24       | 35        | 30        | 22        | 53        |          | 20        | 23        | 25        |
| <i>L thermotolerans</i>  |          |           | 24        | 5         |           |          |           |           |           |
| <i>L waltii</i>          |          |           | 19        | 48        | 45        |          |           |           | 5         |
| <i>K lactis</i>          | 13       | 20        | 26        | 12        | 45        | 8        | 8         | 45        | 19        |
| <i>E gossypii</i>        |          |           | 4         | 6         | 9         |          |           |           |           |
| <b><i>C glabrata</i></b> | <b>2</b> | <b>14</b> | <b>38</b> | <b>21</b> | <b>32</b> | <b>3</b> | <b>17</b> | <b>30</b> | <b>10</b> |
| <i>N castellii</i>       | 31       | 21        | 34        | 14        | 63        | 18       | 49        | 30        | 9         |
| <i>S bayanus</i>         | 24       | 30        | 23        | 46        | 43        | 38       | 18        | 51        | 32        |
| <i>S mikatae</i>         | 15       | 46        | 26        | 38        | 44        | 47       | 5         | 39        | 34        |
| <i>S paradoxus</i>       | 15       | 49        | 17        | 23        | 56        | 32       | 16        | 24        | 26        |
| <i>S cerevisiae</i>      | 23       | 37        | 39        | 30        | 61        | 56       | 18        | 29        | 30        |
| <i>C tropicalis</i>      | 7        | 12        | 9         | 2         |           |          | 5         | 9         | 5         |
| <i>C albicans</i>        | 7        | 12        | 54        | 1         |           |          | 4         | 19        | 4         |
| <i>C dubliniensis</i>    | 8        | 12        | 43        | 2         |           |          |           | 22        | 7         |
| <i>C lusitaniae</i>      |          |           | 29        |           |           |          |           |           |           |
| <i>C guilliermondii</i>  |          |           | 10        | 15        |           |          |           |           |           |
| <i>D hansenii</i>        |          |           | 18        | 22        |           |          |           |           | 21        |

**Figure S1** Several crossover proteins show low CAI ranks in *Candida glabrata*. We corrected for the genome-wide distribution of CAI in each species by reporting each gene's rank, shown here as percentile rank. In these data, *C. glabrata* has very low codon bias for *MSH4*, *MSH5*, *ZIP1*, *ZIP3*, and *MER3*, but bias at *MLH1*, *MLH3*, and *ZIP4* are not as extreme.
